# Supplementary material for: A new copper species based on an azo-compound utilized as a homogeneous catalyst for water oxidation
Source: Royal Society of Chemistry journal article supplement (doi:10.1039/c4dt03097d), 2014-10-24
Supplement: c4dt03097d1.pdf [file c4dt03097d1.pdf]

## Supporting information

### **A New Copper Species Based on An Azo-compound Utilized as A Homogeneous Catalyst for Water Oxidation**

Wei-Bin Yu\*, Qing-Ya He, Xiu-Fang Ma, Hua-Tian Shi, and Xianwen Wei\*

1. Figure s1. The PXRD patterns of **1**.
2. Figure s3. IR spectra of **1**.
3. Table s1. Crystal data and structure refinement for **1**.

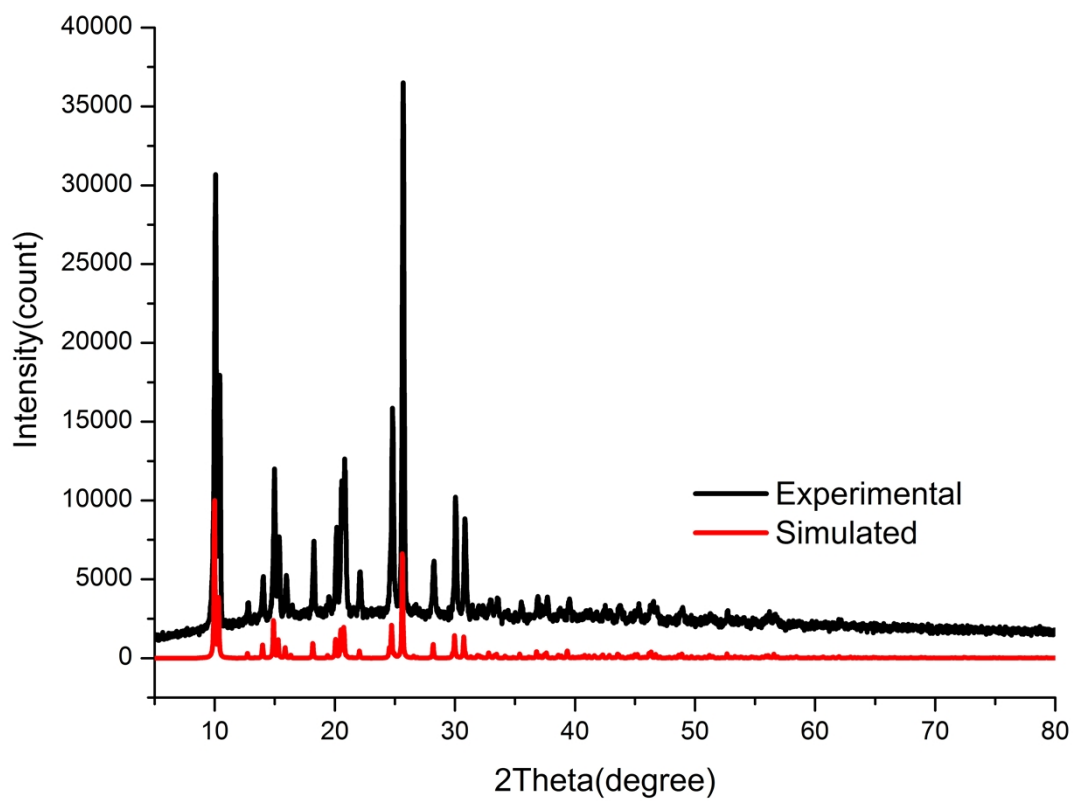

Figure s1. The PXRD patterns of 1.

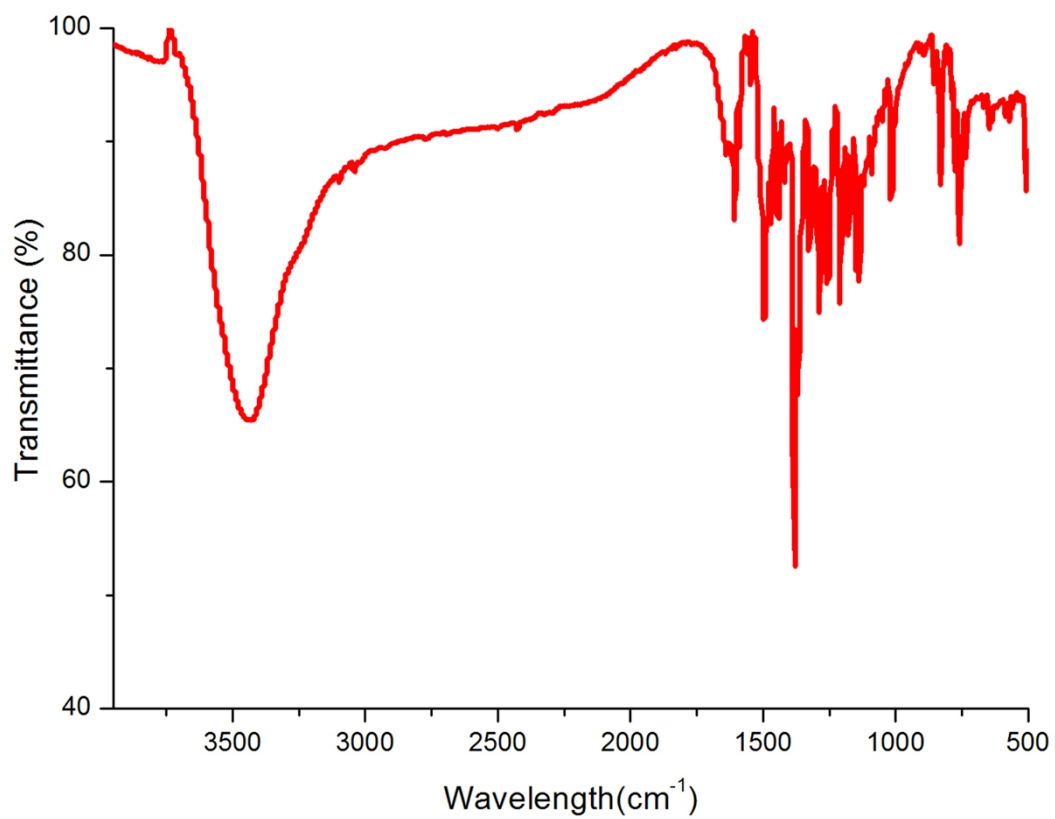

Figure s3. IR spectra of **1**.

|                                   |                                                                                                                      |
|-----------------------------------|----------------------------------------------------------------------------------------------------------------------|
| Empirical formula                 | C <sub>15</sub> H <sub>10</sub> Cu N <sub>4</sub> O <sub>4</sub>                                                     |
| Formula weight                    | 373.81                                                                                                               |
| Temperature                       | 296(2) K                                                                                                             |
| Wavelength                        | 0.71073 Å                                                                                                            |
| Crystal system, space group       | Monoclinic, P2(1)/n                                                                                                  |
| Unit cell dimensions              | a = 9.046(3) Å    alpha = 90 deg.<br>b = 11.876(4) Å    beta = 108.792(4) deg.<br>c = 14.006(5) Å    gamma = 90 deg. |
| Volume                            | 1424.5(8) Å <sup>3</sup>                                                                                             |
| Z, Calculated density             | 4, 1.743 Mg/m <sup>3</sup>                                                                                           |
| Absorption coefficient            | 1.563 mm <sup>-1</sup>                                                                                               |
| F(000)                            | 756                                                                                                                  |
| Crystal size                      | 0.21 x 0.17 x 0.15 mm                                                                                                |
| Theta range for data collection   | 2.93 to 27.59 deg.                                                                                                   |
| Limiting indices                  | -11 ≤ h ≤ 11, -15 ≤ k ≤ 7, -17 ≤ l ≤ 18                                                                              |
| Reflections collected / unique    | 8608 / 3289 [R(int) = 0.0580]                                                                                        |
| Completeness to theta = 27.71     | 99.5 %                                                                                                               |
| Max. and min. transmission        | 0.7993 and 0.7349                                                                                                    |
| Refinement method                 | Full-matrix least-squares on F <sup>2</sup>                                                                          |
| Data / restraints / parameters    | 3289 / 0 / 217                                                                                                       |
| Goodness-of-fit on F <sup>2</sup> | 0.922                                                                                                                |
| Final R indices [I > 2σ(I)]       | R1 = 0.0538, wR2 = 0.1410                                                                                            |
| R indices (all data)              | R1 = 0.1065, wR2 = 0.1754                                                                                            |
| Largest diff. peak and hole       | 0.428 and -0.646 e.Å <sup>-3</sup>                                                                                   |

Table s1. Crystal data and structure refinement for **1**.
